# Supplementary material for: Magnetic-field-induced diameter-selective synthesis of single-walled carbon nanotubes
Source: Royal Society of Chemistry journal article supplement (doi:10.1039/c2nr11783e), 2011-12-23
Supplement: c2nr11783e.pdf [file c2nr11783e.pdf]

## Supporting Information

# Magnetic-field-induced diameter-selective synthesis of single-walled carbon nanotubes

Yanjie Su, Yaozhong Zhang, Hao Wei, Liling Zhang, Jiang Zhao, Zhi Yang, and Yafei Zhang\*

Key Laboratory for Thin Film and Microfabrication Technology of the Ministry of Education, Research

Institute of Micro/Nano Science and Technology, Shanghai Jiao Tong University, Shanghai 200240,

China

E-mail address: [yfzhang@sjtu.edu.cn](mailto:yfzhang@sjtu.edu.cn).

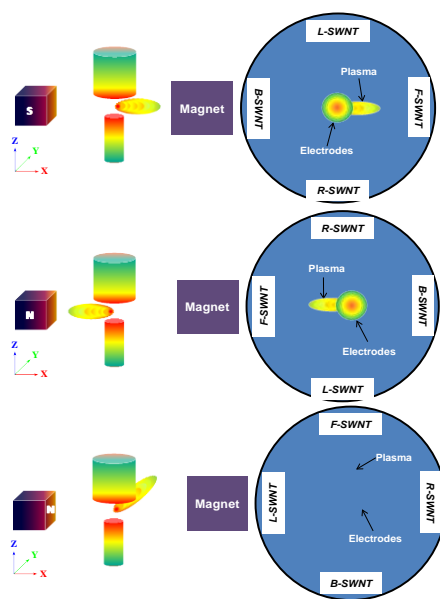

Figure S1. SWNTs samples collected in four different regions, remarked by *F-SWNT*, *B-SWNT*, *R-SWNT*, and *L-SWNT*, respectively.

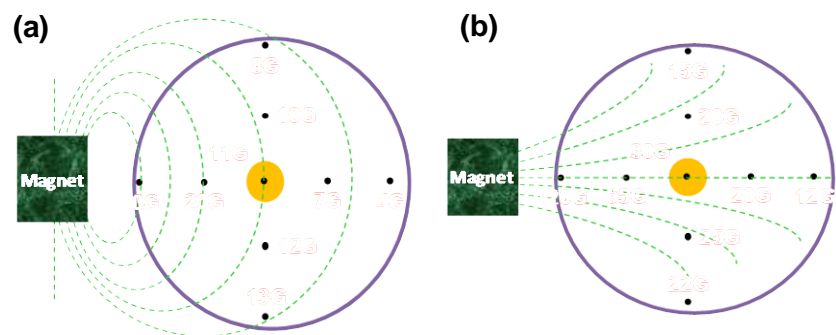

Figure S2. The magnetic field strengths in different regions after applying  $X$ ,  $-X$  magnetic fields (a) and  $Y$  magnetic field (b).

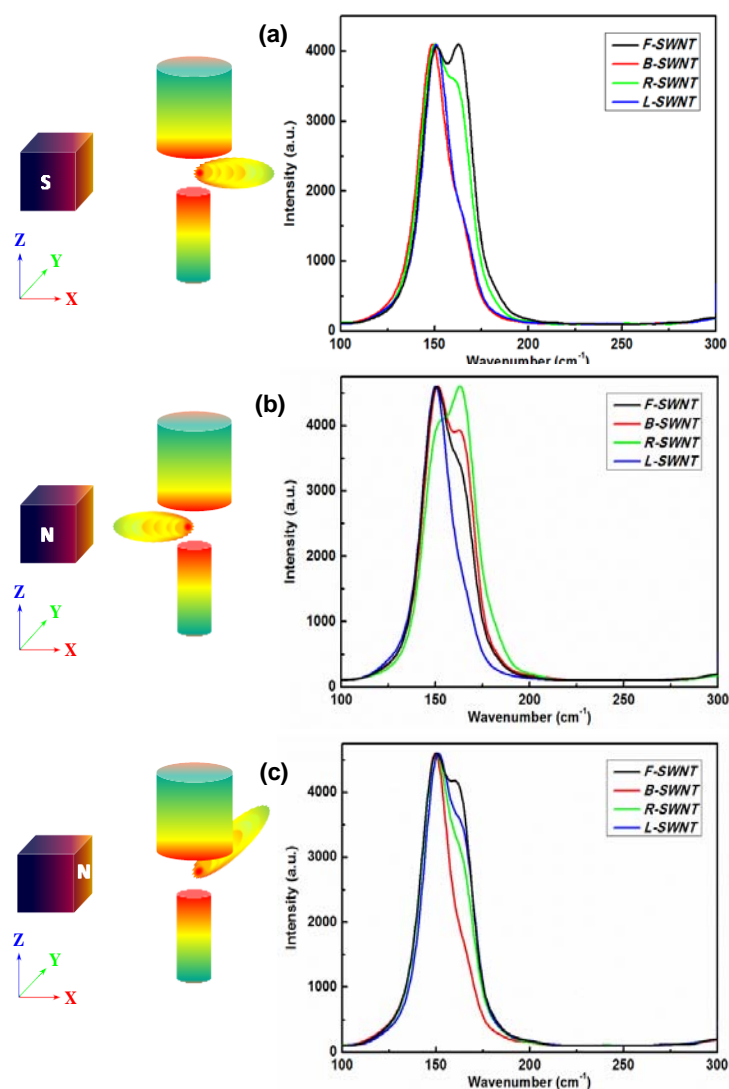

Figure S3. Schematic diagram of arc plasma morphologies and RBM spectra of the as-synthesized SWNTs in different regions using 785 nm excitation. RBM peaks were normalized to the maximum peaks.

Table S1. Peak areas of  $S_{22}$  and  $M_{11}$  and relative ratios of S/M in different SWNT samples.

| Samples       | $S_{22} \times 10^3$ | $M_{11} \times 10^3$ | Relative ratios (S/M) |
|---------------|----------------------|----------------------|-----------------------|
| <i>F-SWNT</i> | 16.43                | 2.09                 | 7.86                  |
| <i>B-SWNT</i> | 17.76                | 2.42                 | 7.34                  |
| <i>R-SWNT</i> | 17.06                | 2.39                 | 7.14                  |
| <i>L-SWNT</i> | 17.67                | 2.28                 | 7.75                  |
